# Supplementary material
Source: Springer Nature journal article supplement (https://www.springermedizin.de/resource/supplementary/12894_2011_187_MOESM2_ESM.pdf/9513146)

**A**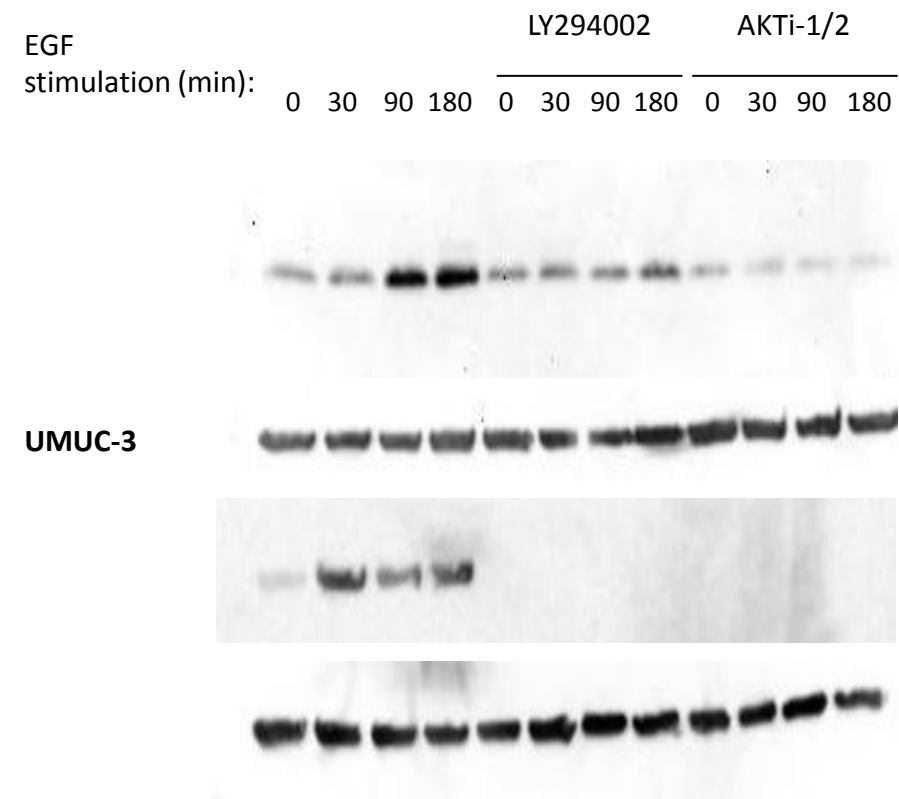**B**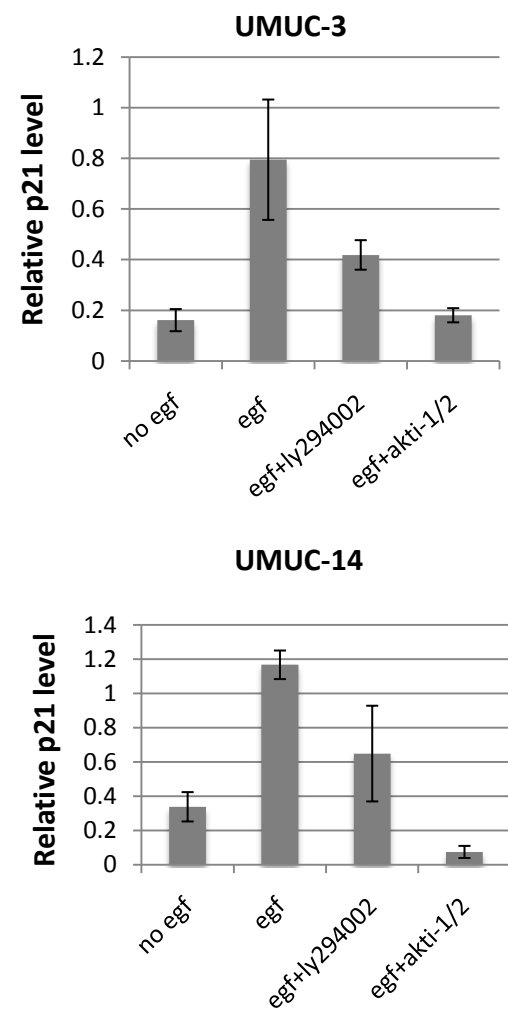

Supplement: MOESM2 [file 9513146]
